# Supplementary material for: Highly stable magnetic multiwalled carbon nanotube composites for solid-phase extraction of linear alkylbenzene sulfonates in environmental water samples prior to high-performance liquid chromatography analysis
Source: Royal Society of Chemistry journal article supplement (doi:10.1039/c2an16030g), 2012-01-01
Supplement: c2an16030g.pdf [file c2an16030g.pdf]

Electronic Supplementary Information

**Highly stable magnetic multiwalled carbon nanotube composites for  
solid-phase extraction of linear alkylbenzene sulfonates in  
environmental water samples prior to high-performance liquid  
chromatography analysis**

**Bo Chen, Sha Wang, Qianmao Zhang, Yuming Huang\***

*The Key Laboratory of Eco-environments in Three Gorges Reservoir Region  
(Ministry of Education); College of Chemistry and Chemical Engineering,  
Southwest University; Chongqing 400715, China*

*E-mail: ymhuang@swu.edu.cn*

Table S1 Recoveries of LAS homologues sorbed onto the MMWCNTs surface in the presence of foreign inorganic species (LAS homologues concentration: 50  $\mu\text{g L}^{-1}$ ).

| Co-existing ions              | At concentration         | Recovery (%) <sup>a</sup> |             |             |             |
|-------------------------------|--------------------------|---------------------------|-------------|-------------|-------------|
|                               |                          | C10-LAS                   | C11-LAS     | C12-LAS     | C13-LAS     |
| K <sup>+</sup>                | 100 mg L <sup>-1</sup>   | 94.06±6.93                | 94.37±1.06  | 101.27±2.65 | 99.18±3.78  |
| Ca <sup>2+</sup>              | 100 mg L <sup>-1</sup>   | 49.33±1.73                | 50.98±0.71  | 23.34±1.01  | 39.15±2.16  |
| Ca <sup>2+</sup>              | 30 mg L <sup>-1</sup>    | 66.47±3.10                | 63.18±0.67  | 72.33±1.96  | 56.33±4.04  |
| Ca <sup>2+</sup> -NaF*        | 30 mg L <sup>-1</sup>    | 97.83±1.63                | 91.23±3.46  | 92.41±5.05  | 95.04±4.58  |
| Mg <sup>2+</sup>              | 50 mg L <sup>-1</sup>    | 98.35±1.73                | 97.46±1.42  | 95.30±5.31  | 97.65±1.62  |
| NH <sub>4</sub> <sup>+</sup>  | 2 mg L <sup>-1</sup>     | 106.01±3.03               | 98.13±0.95  | 105.19±1.93 | 103.39±5.41 |
| SO <sub>4</sub> <sup>2-</sup> | 200 mg L <sup>-1</sup>   | 101.11±3.03               | 99.05±4.14  | 103.31±3.14 | 102.62±1.08 |
| NO <sub>3</sub> <sup>-</sup>  | 50 mg L <sup>-1</sup>    | 101.41±3.47               | 94.87±0.83  | 94.78±4.10  | 102.24±3.78 |
| PO <sub>4</sub> <sup>3-</sup> | 30 mg L <sup>-1</sup>    | 103.25±1.73               | 96.21±0.35  | 95.81±1.21  | 99.56±4.33  |
| CO <sub>3</sub> <sup>2-</sup> | 30 mg L <sup>-1</sup>    | 99.27±3.03                | 99.30±1.42  | 101.95±3.14 | 94.21±3.24  |
| Al <sup>3+</sup>              | 100 $\mu\text{g L}^{-1}$ | 98.69±1.81                | 95.47±2.45  | 92.94±3.99  | 94.54±3.06  |
| Pb <sup>2+</sup>              | 100 $\mu\text{g L}^{-1}$ | 103.05±1.45               | 102.47±1.67 | 97.60±2.95  | 94.18±1.53  |
| Mn <sup>2+</sup>              | 20 $\mu\text{g L}^{-1}$  | 93.56±4.72                | 99.40±4.67  | 103.49±1.91 | 102.11±5.61 |
| Zn <sup>2+</sup>              | 100 $\mu\text{g L}^{-1}$ | 98.95±2.90                | 96.96±4.79  | 101.77±1.91 | 96.34±1.53  |
| Fe <sup>3+</sup>              | 50 $\mu\text{g L}^{-1}$  | 21.45±0.43                | 21.89±0.24  | 26.54±1.69  | 25.77±1.62  |
| Fe <sup>3+</sup>              | 30 $\mu\text{g L}^{-1}$  | 69.21±2.32                | 60.48±1.35  | 56.72±2.78  | 54.90±3.03  |
| Fe <sup>3+</sup> -NaF*        | 30 $\mu\text{g L}^{-1}$  | 98.62±1.17                | 92.11±2.37  | 95.66±1.30  | 95.04±2.01  |

<sup>a</sup> Mean value±standard deviation (n = 3). \* NaF concentration: 200  $\mu\text{mol L}^{-1}$ .

Table S2 Recoveries of LAS homologues sorbed onto the MMWCNTs surface in the presence of foreign organic species (LAS homologues concentration: 50  $\mu\text{g L}^{-1}$ ).

| Co-existing organic substances | Reported concentration           | Ref.   | Selected concentration   | Recovery (%) <sup>a</sup> |             |             |             |
|--------------------------------|----------------------------------|--------|--------------------------|---------------------------|-------------|-------------|-------------|
|                                |                                  |        |                          | C10-LAS                   | C11-LAS     | C12-LAS     | C13-LAS     |
| Acetic acid                    | 13.01 mg L <sup>-1</sup>         | [1]    | 10 mg L <sup>-1</sup>    | 94.34±1.28                | 95.24±4.31  | 91.90±2.85  | 93.37±2.42  |
| Propionic acid                 | 1.72 mg L <sup>-1</sup>          | [1]    | 5 mg L <sup>-1</sup>     | 92.99±1.92                | 98.79±1.67  | 94.67±2.50  | 97.66±3.64  |
| n-butyric acid                 | 2.71 mg L <sup>-1</sup>          | [1]    | 2 mg L <sup>-1</sup>     | 92.08±5.76                | 106.57±1.67 | 106.53±1.43 | 99.38±6.07  |
| Isobutyric acid                | 1.25 mg L <sup>-1</sup>          | [1]    | 2 mg L <sup>-1</sup>     | 98.41±7.04                | 106.91±1.20 | 101.48±2.85 | 98.52±3.28  |
| Pentanoic acid                 | n.d                              | [1]    | 2 mg L <sup>-1</sup>     | 98.41±7.04                | 106.91±1.20 | 101.48±2.85 | 98.52±7.28  |
| Isopentanoic acid              | 0.40 mg L <sup>-1</sup>          | [1]    | 0.5 mg L <sup>-1</sup>   | 102.94±5.76               | 105.39±1.91 | 103.75±3.21 | 101.95±4.85 |
| Hexoic acid                    | n.d                              | [1]    | 0.2 mg L <sup>-1</sup>   | 99.77±1.28                | 106.40±1.91 | 100.73±2.50 | 101.95±4.85 |
| Phenol                         | 8.43 $\mu\text{g L}^{-1}$        | [1]    | 10 $\mu\text{g L}^{-1}$  | 94.03±3.84                | 96.93±3.23  | 91.32±1.60  | 95.00±1.82  |
| 4-methylphenol                 | 1.44 $\mu\text{g L}^{-1}$        | [1]    | 2 $\mu\text{g L}^{-1}$   | 103.34±1.85               | 103.60±2.07 | 104.90±3.26 | 109.28±4.23 |
| Pentachlorophenol              | 0.56 $\mu\text{g L}^{-1}$        | [2, 3] | 0.5 $\mu\text{g L}^{-1}$ | 102.48±3.84               | 105.55±1.67 | 95.94±2.14  | 98.52±2.43  |
| Bisphenol A                    | 0.032-0.139 $\mu\text{g L}^{-1}$ | [4,5]  | 50 ng L <sup>-1</sup>    | 103.51±3.71               | 109.14±3.69 | 102.14±5.08 | 96.13±5.64  |
| 2,4-dinitrophenol              | 0.2-6 $\mu\text{g L}^{-1}$       | [6]    | 2 $\mu\text{g L}^{-1}$   | 99.32±3.20                | 109.78±1.91 | 109.55±1.43 | 100.24±7.28 |
| 2,4,6-trinitrophenol           | 0.2-6 $\mu\text{g L}^{-1}$       | [6]    | 2 $\mu\text{g L}^{-1}$   | 102.03±0.64               | 106.23±1.67 | 104.51±0.71 | 99.38±3.64  |
| <i>p</i> -Nitroaniline         | 5.89×10 <sup>-8</sup> M          | [7]    | 5×10 <sup>-8</sup> M     | 98.09±0.62                | 101.16±2.30 | 108.49±1.81 | 104.90±5.64 |
| 2,4-dinitroaniline             | 5.18×10 <sup>-8</sup> M          | [7]    | 5×10 <sup>-8</sup> M     | 103.77±4.95               | 105.39±3.23 | 109.78±3.63 | 108.89±.64  |
| Ciprofloxacin                  | 33-87 ng L <sup>-1</sup>         | [8]    | 50 ng L <sup>-1</sup>    | 94.16±2.47                | 106.37±1.84 | 103.37±3.26 | 103.90±4.23 |
| Fleroxacin                     | 26-61 ng L <sup>-1</sup>         | [8]    | 50 ng L <sup>-1</sup>    | 96.78±3.71                | 108.98±0.46 | 105.42±0.36 | 105.89±4.23 |
| Norfloxacin                    | <45 ng L <sup>-1</sup>           | [9]    | 50 ng L <sup>-1</sup>    | 97.65±1.24                | 104.25±0.23 | 100.80±3.26 | 94.93±2.82  |
| Levofloxacin                   | n.d                              | [9]    | 50 ng L <sup>-1</sup>    | 95.03±1.24                | 108.33±0.92 | 96.96±2.18  | 101.91±4.23 |
| Toluene                        | 0.75 $\mu\text{g L}^{-1}$        | [1]    | 0.5 $\mu\text{g L}^{-1}$ | 96.78±1.24                | 103.44±3.23 | 103.37±4.71 | 102.90±2.82 |
| Naphthalene                    | 0.16 $\mu\text{g L}^{-1}$        | [1]    | 50 ng L <sup>-1</sup>    | 97.22±3.09                | 105.07±2.76 | 108.75±2.18 | 109.88±1.41 |
| Pyrene                         | n.d                              | [10]   | 50 ng L <sup>-1</sup>    | 97.65±2.47                | 107.51±2.07 | 110.54±0.36 | 111.88±1.41 |
| Anthracene                     | 0.011 $\mu\text{g L}^{-1}$       | [10]   | 50 ng L <sup>-1</sup>    | 100.28±1.24               | 107.67±1.84 | 104.39±1.81 | 109.88±4.23 |

## References

1. M. Huang, Y. Li and G. Gu, *Desalination*, 2010, 262, 36-42.
2. L. Zhao, Q. Feng and J. Lin, *Anal. Chim. Acta*, 2009, 650, 70-76.
3. J. Li, X. Zhao, Y. Shi, Y. Cai, S. Mou and G. Jiang, *J. Chromatogr. A*, 2008, 1180, 24-31.
4. X. Zhao, Y. Shi, T. Wang, Y. Cai and G. Jiang, *J. Chromatogr. A*, 2008, 1188, 140-147.
5. M. Kawaguchi, Y. Hayatsu, H. Nakata, Y. Ishii, R. Ito, K. Saito and H. Nakazawa, *Anal. Chim. Acta*, 2005, 539, 83-89.
6. E. Pocurull, R.M. Marce, F. Borrull, J.L. Bernal, L. Toribio, M.L. Serna, *J. Chromatogr. A*, 755 (1996) 67-74
7. C. Tong, Y. Guo and W. Liu, *Chemosphere*, 2010, 81, 430-435.
8. L. Chen, X. Zhang, Y. Xu, X. Du, X. Sun, L. Sun, H. Wang, Q. Zhao, A. Yu, H. Zhang and L. Ding, *Anal. Chim. Acta*, 2010, 662, 31-38.
9. H. Nakata, K. Kannan, P. D. Jones and John P. Giesy, *Chemosphere*, 2005, 58, 759-766.
10. W. Wang, Y. Huang, W. Shu and J. Cao, *J. Chromatogr. A*, 2007, 1173, 27-36.

Table S3. Reproducibility of the MMWCNTs as SPE adsorbent for extraction of LAS from water samples.

| Compounds | Concentration level<br>( $\mu\text{g L}^{-1}$ ) | RSD (%) (for single batch) <sup>a</sup> |         |         | RSD (%)<br>(among batches) <sup>a</sup> |
|-----------|-------------------------------------------------|-----------------------------------------|---------|---------|-----------------------------------------|
|           |                                                 | Batch 1                                 | Batch 2 | Batch 3 |                                         |
| C10-LAS   | 9.60                                            | 1.9                                     | 1.5     | 1.8     | 1.5                                     |
| C11-LAS   | 15.10                                           | 0.7                                     | 0.5     | 0.9     | 0.6                                     |
| C12-LAS   | 14.10                                           | 1.2                                     | 1.0     | 1.0     | 3.2                                     |
| C13-LAS   | 11.00                                           | 3.8                                     | 2.7     | 2.8     | 4.8                                     |

<sup>a</sup> Averages of three determinations.

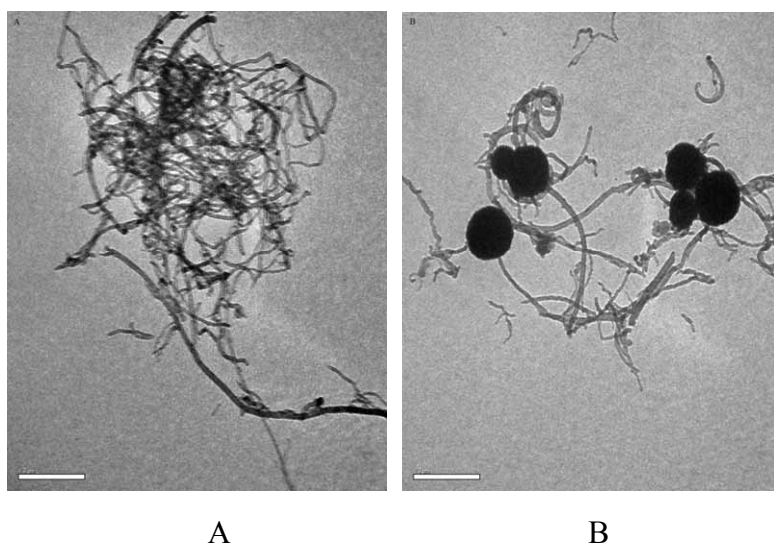

Figure S1. TEM images of pristine MWCNTs (A) and magnetic MWCNTs (B).

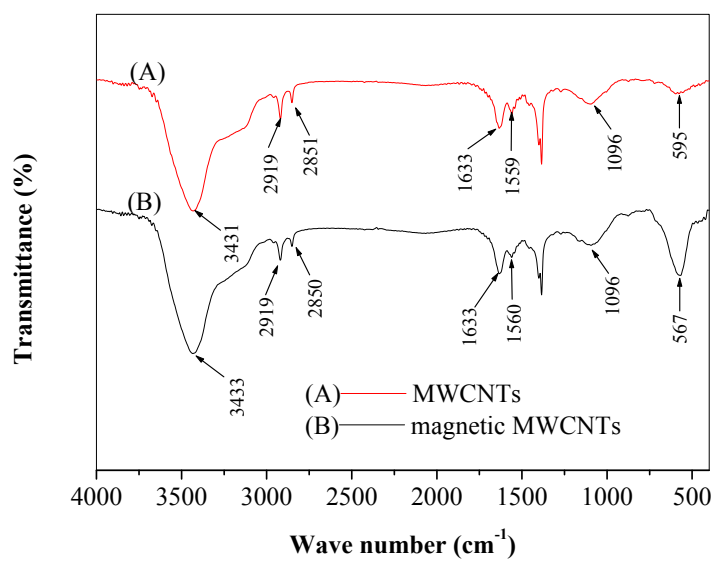

Figure S2. FT-IR spectra of pristine MWCNTs (A) and magnetic MWCNTs (B).

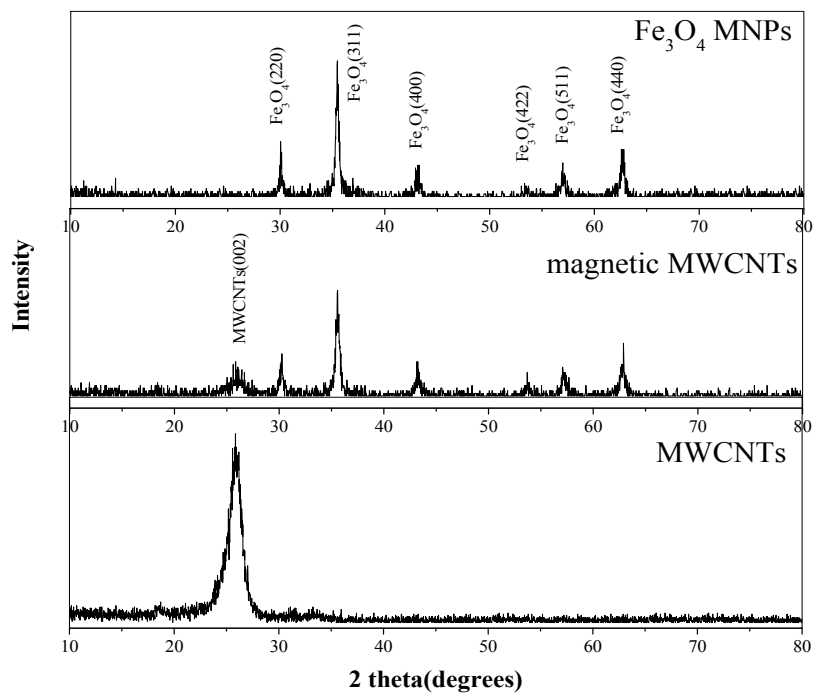

Figure S3. XRD patterns of Fe<sub>3</sub>O<sub>4</sub> MNPs, magnetic MWCNTs composites and the pristine MWCNTs.

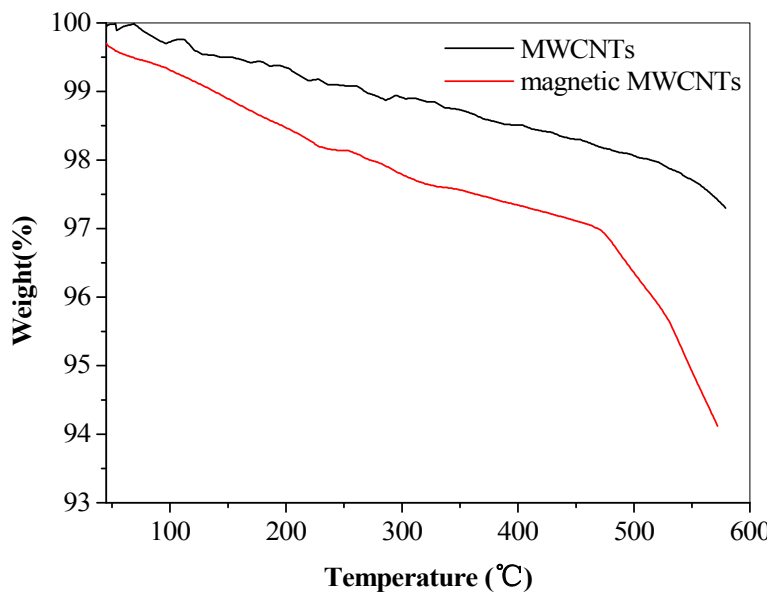

Figure S4. TGA curves of MWCNTs (dark line) and magnetic MWCNTs (red line).

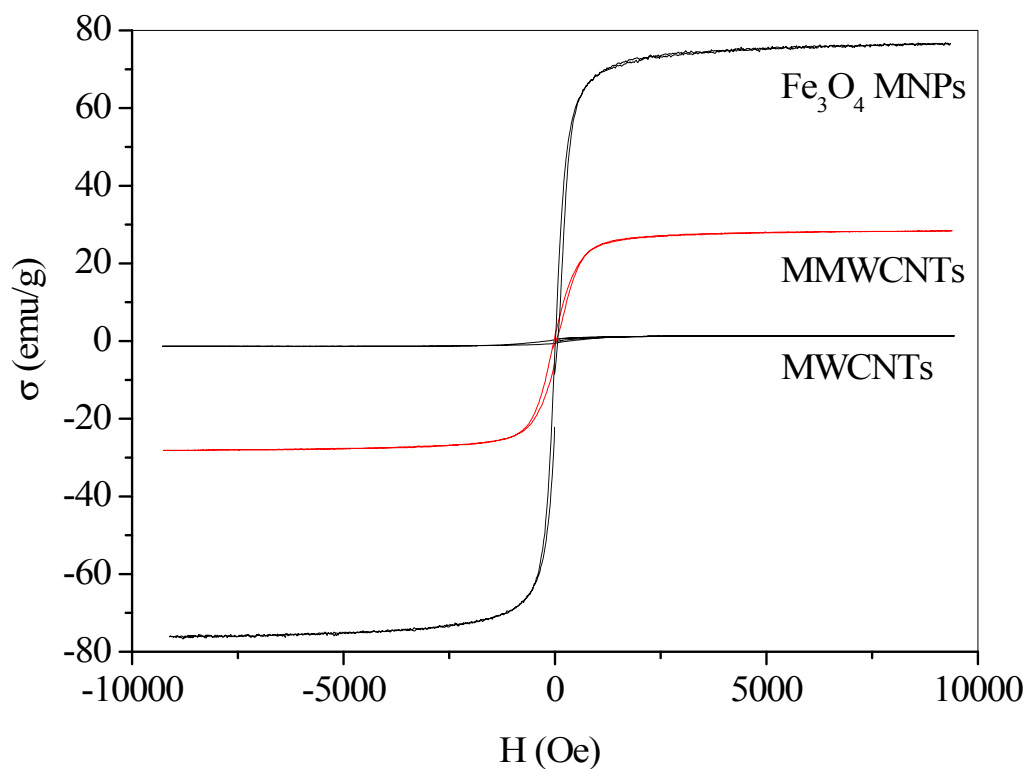

Figure S5. VSM magnetization curves of MWCNTs, Fe<sub>3</sub>O<sub>4</sub>, and the synthesized MMWCNTs.

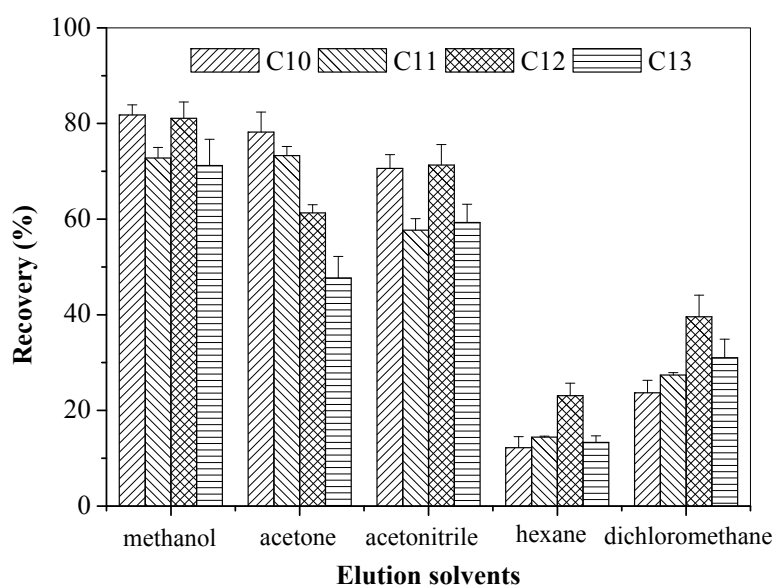

Figure S6. Effect of eluent solvent on extraction efficiency of LAS. MMWCNTs: 0.1 g; LAS concentration: 50  $\mu\text{g L}^{-1}$ ; sample solution volume: 100 mL (pH 5.0); adsorption time: 40 min; adsorption temperature: 40  $^{\circ}\text{C}$ ; ultrasonic desorption time: 30 s. Error bars represent one standard deviation for three measurements.

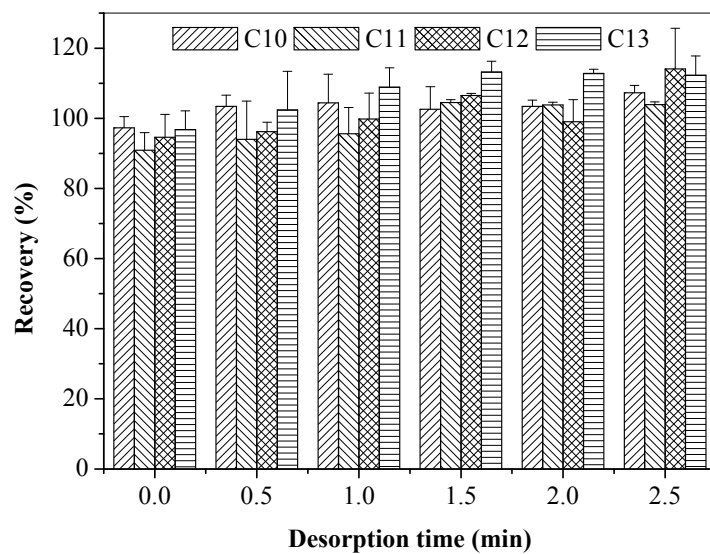

Figure S7. Effect of ultrasonic desorption time on extraction efficiency of LAS. MMWCNTs: 0.1 g; LAS concentration:  $50 \mu\text{g L}^{-1}$ ; sample solution volume: 100 mL (pH 7.0); adsorption temperature:  $40^\circ\text{C}$ ; adsorption time: 40 min; elution: 6 mL methanol. Error bars represent one standard deviation for three measurements.

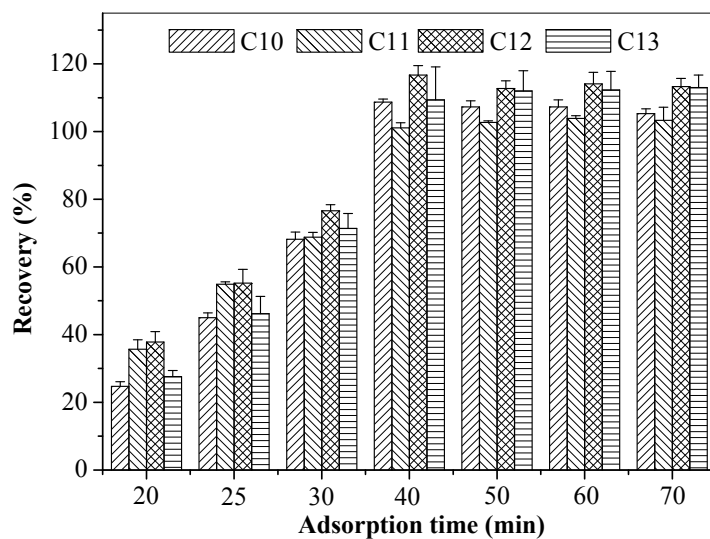

Figure S8. Effect of contact time on extraction efficiency of LAS. MMWCNTs: 0.1 g; LAS concentration:  $50 \mu\text{g L}^{-1}$ ; sample solution volume: 100 mL (pH 7.0); adsorption temperature:  $40^\circ\text{C}$ ; ultrasonic desorption time: 30 s; elution: 6 mL methanol. Error bars represent one standard deviation for three measurements.



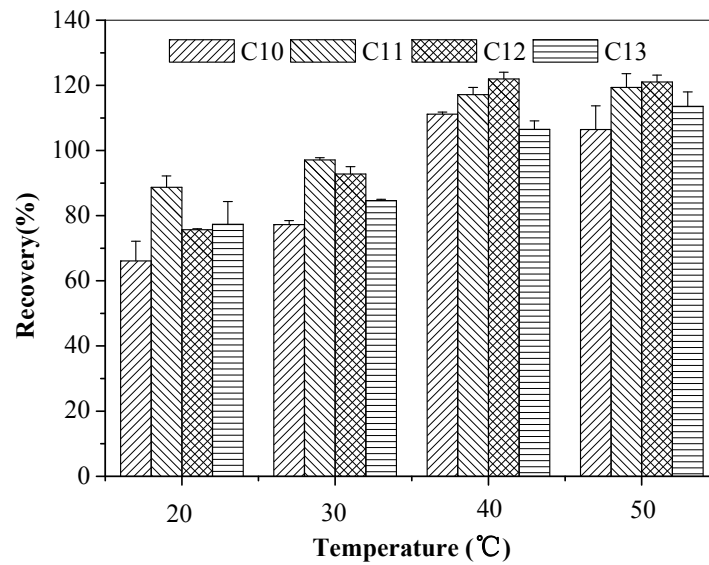

Figure S9. Effect of adsorption temperature on extraction efficiency of LAS. MMWCNTs: 0.1 g; LAS concentration:  $50 \mu\text{g L}^{-1}$ ; sample solution volume: 100 mL (pH 7.0); adsorption time: 40 min; ultrasonic desorption time: 30 s; elution: 6 mL methanol. Error bars represent one standard deviation for three measurements.

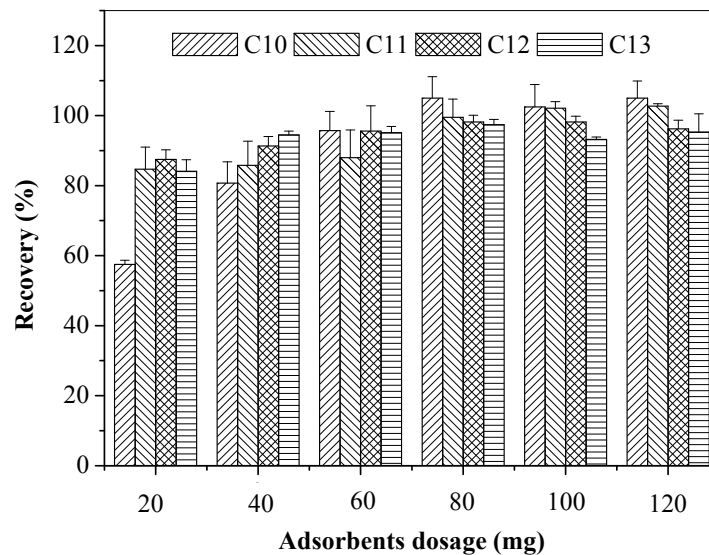

Figure S10. Fig. 2 Effect of amounts of the adsorbents on extraction efficiency of LAS. MMWCNTs: 0.1 g; LAS concentration:  $50 \mu\text{g L}^{-1}$ ; sample solution volume: 100 mL (pH=7.0); adsorption time: 40 min; adsorption temperature: 40 °C; ultrasonic desorption time: 30 s; elution: 6 mL methanol. Error bars represent one standard deviation for three measurements.

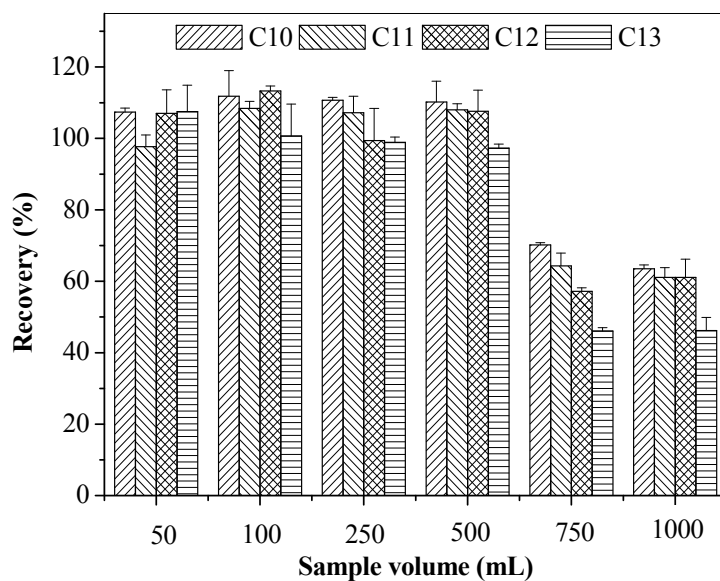

Figure S11. Effect of sample solution volume on extraction efficiency of LAS. MMWCNTs: 0.1 g; LAS concentration:  $50 \mu\text{g L}^{-1}$ ; sample solution pH: 7.0; sample solution volume: 100 mL; adsorption time: 40 min; adsorption temperature:  $40 \text{ }^\circ\text{C}$ ; ultrasonic desorption time: 30 s; elution: 6 mL methanol. Error bars represent one standard deviation for three measurements.

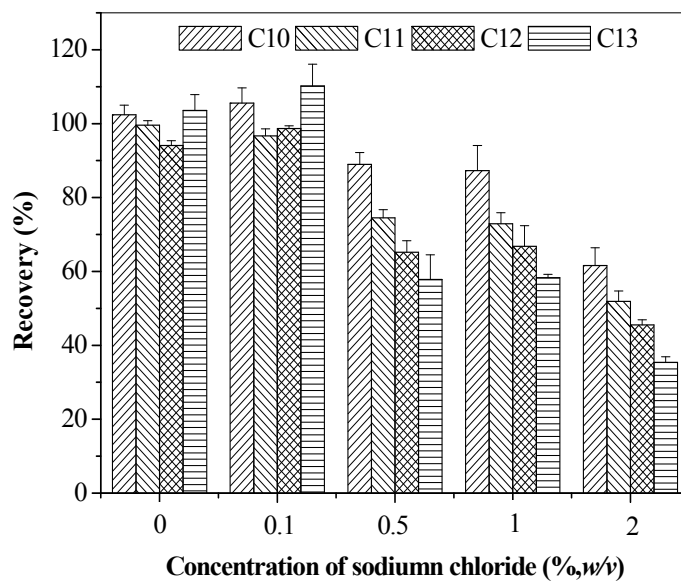

Figure S12. Effect of sodium chloride concentration on extraction efficiency of LAS. MMWCNTs: 0.1 g; LAS concentration:  $50 \mu\text{g L}^{-1}$ ; sample solution volume: 100 mL (pH=7.0); adsorption time: 40 min; adsorption temperature:  $40 \text{ }^\circ\text{C}$ ; ultrasonic desorption time: 30 s; elution: 6 mL methanol. Error bars represent one standard deviation for three measurements. Error bars represent one standard deviation for three measurements.

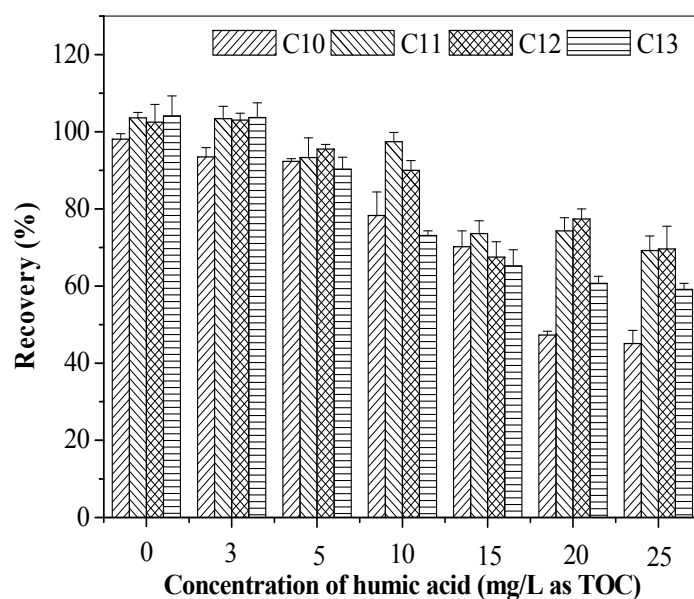

Figure S13. Effect of humic acid concentration on extraction efficiency of LAS. MMWCNTs: 0.1 g; LAS concentration:  $50 \mu\text{g L}^{-1}$ ; sample solution volume: 100 mL (pH=7.0); adsorption time: 40 min; adsorption temperature:  $40 \text{ }^\circ\text{C}$ ; ultrasonic desorption time: 30 s; elution: 6 mL methanol. Error bars represent one standard deviation for three measurements.

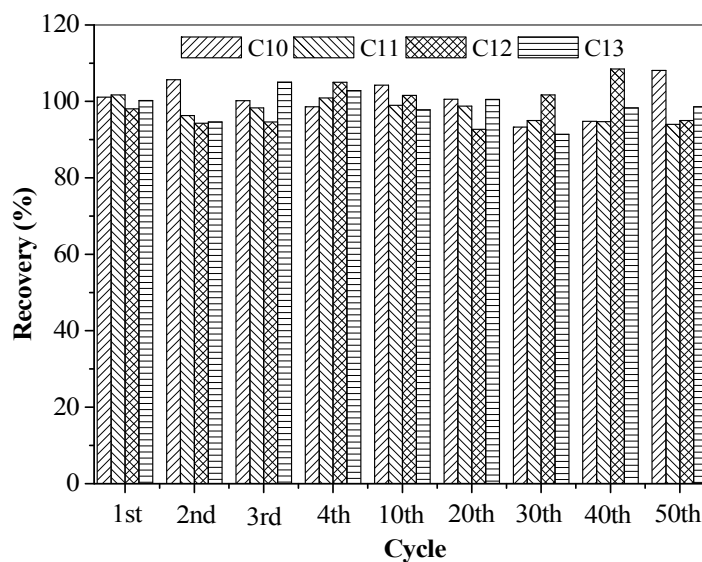

Figure S14. Reusability of the MMWCNTs as SPE adsorbent for extraction of LAS. MMWCNTs: 0.1 g; LAS concentration:  $50 \mu\text{g L}^{-1}$ ; sample solution volume: 500 mL (pH=7.0); adsorption time: 40 min; adsorption temperature:  $40 \text{ }^\circ\text{C}$ ; ultrasonic desorption time: 30 s; elution: 6 mL methanol.
